# Supplementary material
Source: Royal Society of Chemistry journal article supplement (doi:10.1039/d6nj00560h)
Supplement: d6nj00560h1.pdf [file d6nj00560h1.pdf]

## **Harnessing the Synergistic Dual Role of Lignin-Derived Blue Carbon Dots over TiO<sub>2</sub> for Highly Efficient Solar Photocatalytic Degradation of Tetracycline**

Wenbo Cui <sup>a,b</sup>, Ermiao Liang <sup>a</sup>, Ke Cheng <sup>a</sup>, Zhiyi Hou <sup>a</sup>, Changwei Li <sup>a</sup>, Yanhong Liu <sup>a</sup>, Shaoyi Cao <sup>a</sup>, Bing Tian <sup>a</sup>, Chunhui Ma <sup>a</sup>, Mingcong Xu <sup>a</sup>, Peng Wu <sup>c</sup>, Sha Luo <sup>a,\*</sup>, Shouxin Liu <sup>a,\*</sup>, Wei Li <sup>a,b,\*</sup>

<sup>a</sup> State Key Laboratory of Woody Oil Resources Utilization, Northeast Forestry University, Harbin 150040, China

<sup>b</sup> School of Future Technology, Northeast Forestry University, Harbin 150040, China

<sup>c</sup> School of Environmental and Chemical Engineering, Heilongjiang University of Science and Technology, Harbin 150040, China

\* Corresponding author:

Wei Li E-mail: [liwei19820927@126.com](mailto:liwei19820927@126.com)

Sha Luo E-mail: [luo.sha.85@163.com](mailto:luo.sha.85@163.com)

Shouxin Liu E-mail: [liushouxin@126.com](mailto:liushouxin@126.com)

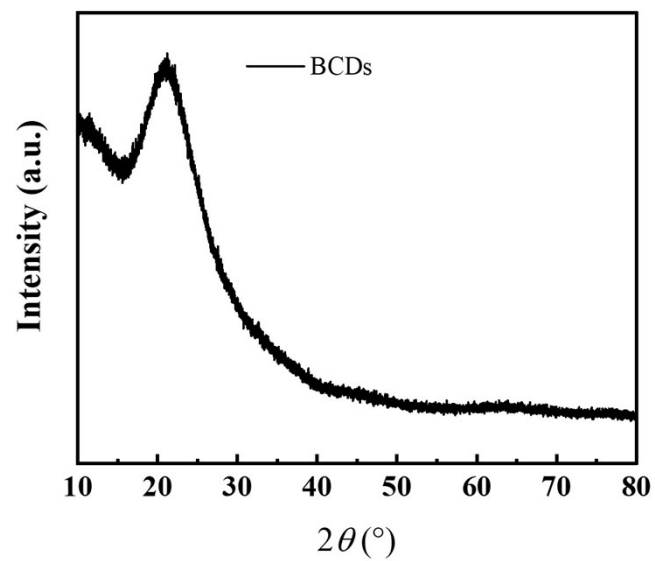

Fig. S1 XRD of BCDs

Table S1 Summary of PL lifetimes of the BCDs

| Sample | Lifetime (ns) | A <sub>1</sub> (%) | τ <sub>1</sub> | A <sub>2</sub> (%) | τ <sub>2</sub> |
|--------|---------------|--------------------|----------------|--------------------|----------------|
| BCDs   | 8.26          | 37.71              | 1.8121         | 62.28              | 9.0391         |

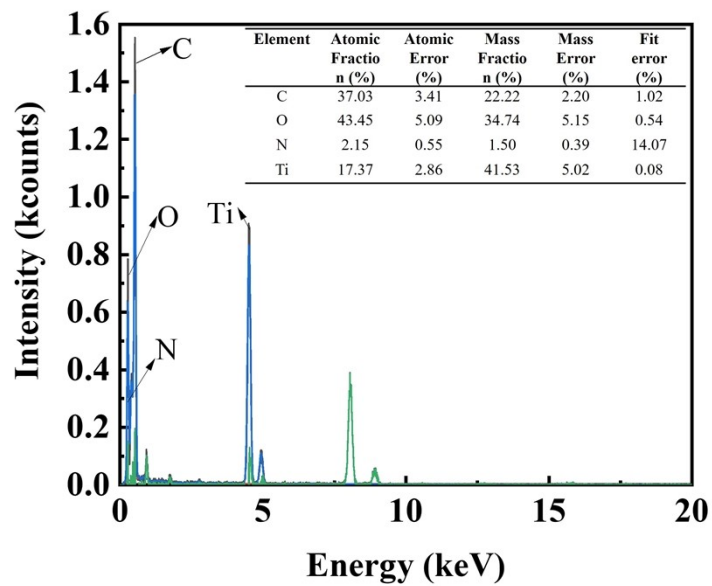

Fig. S2 EDS of BCDs/TiO<sub>2</sub>

Table S2. The specific surface area and pore structure of different sample

| Sample                | Total pore Volume (cm <sup>3</sup> g <sup>-1</sup> ) | Average pore size (nm) | Specific surface area (m <sup>2</sup> g <sup>-1</sup> ) |
|-----------------------|------------------------------------------------------|------------------------|---------------------------------------------------------|
| TiO <sub>2</sub>      | 0.15                                                 | 13.45                  | 45.40                                                   |
| BCDs/TiO <sub>2</sub> | 0.15                                                 | 13.82                  | 41.31                                                   |

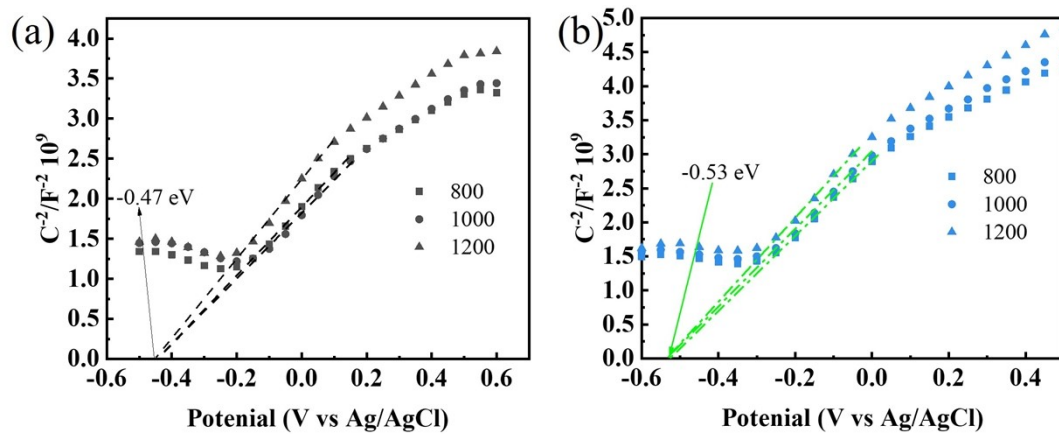

Fig. S3 Model- Schottky curve of (a)  $\text{TiO}_2$  and (b) BCDs/ $\text{TiO}_2$

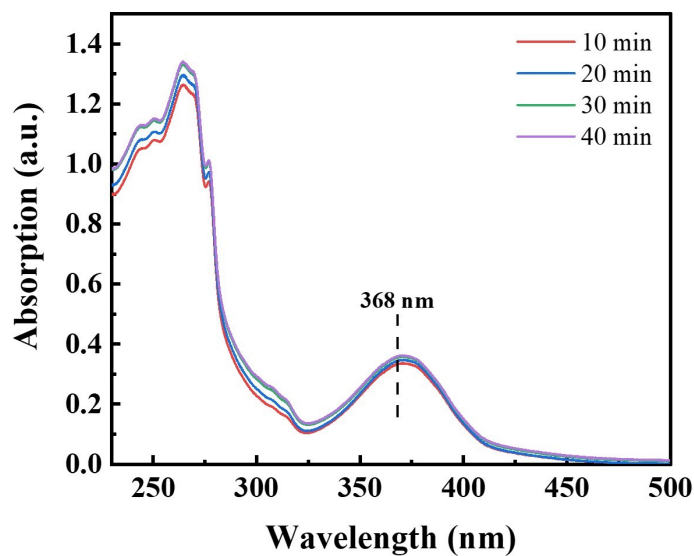

Fig. S4 UV-vis absorption spectrum of the solution under dark adsorption

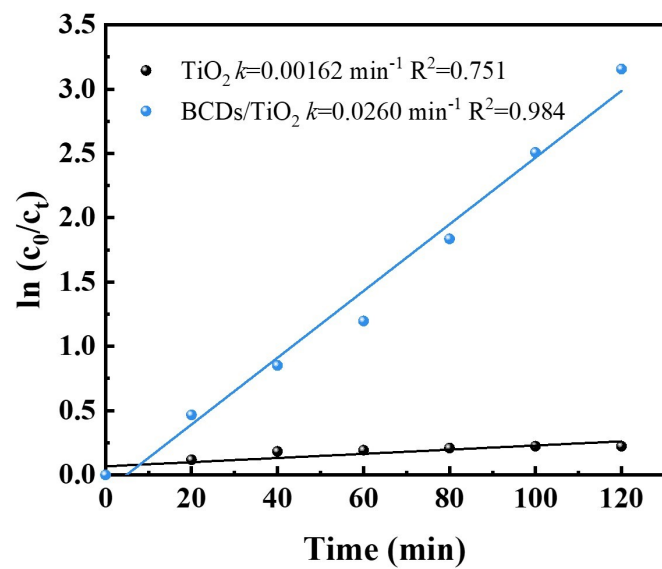

Fig. S5 The kinetic fit curve of catalytic degradation of TC

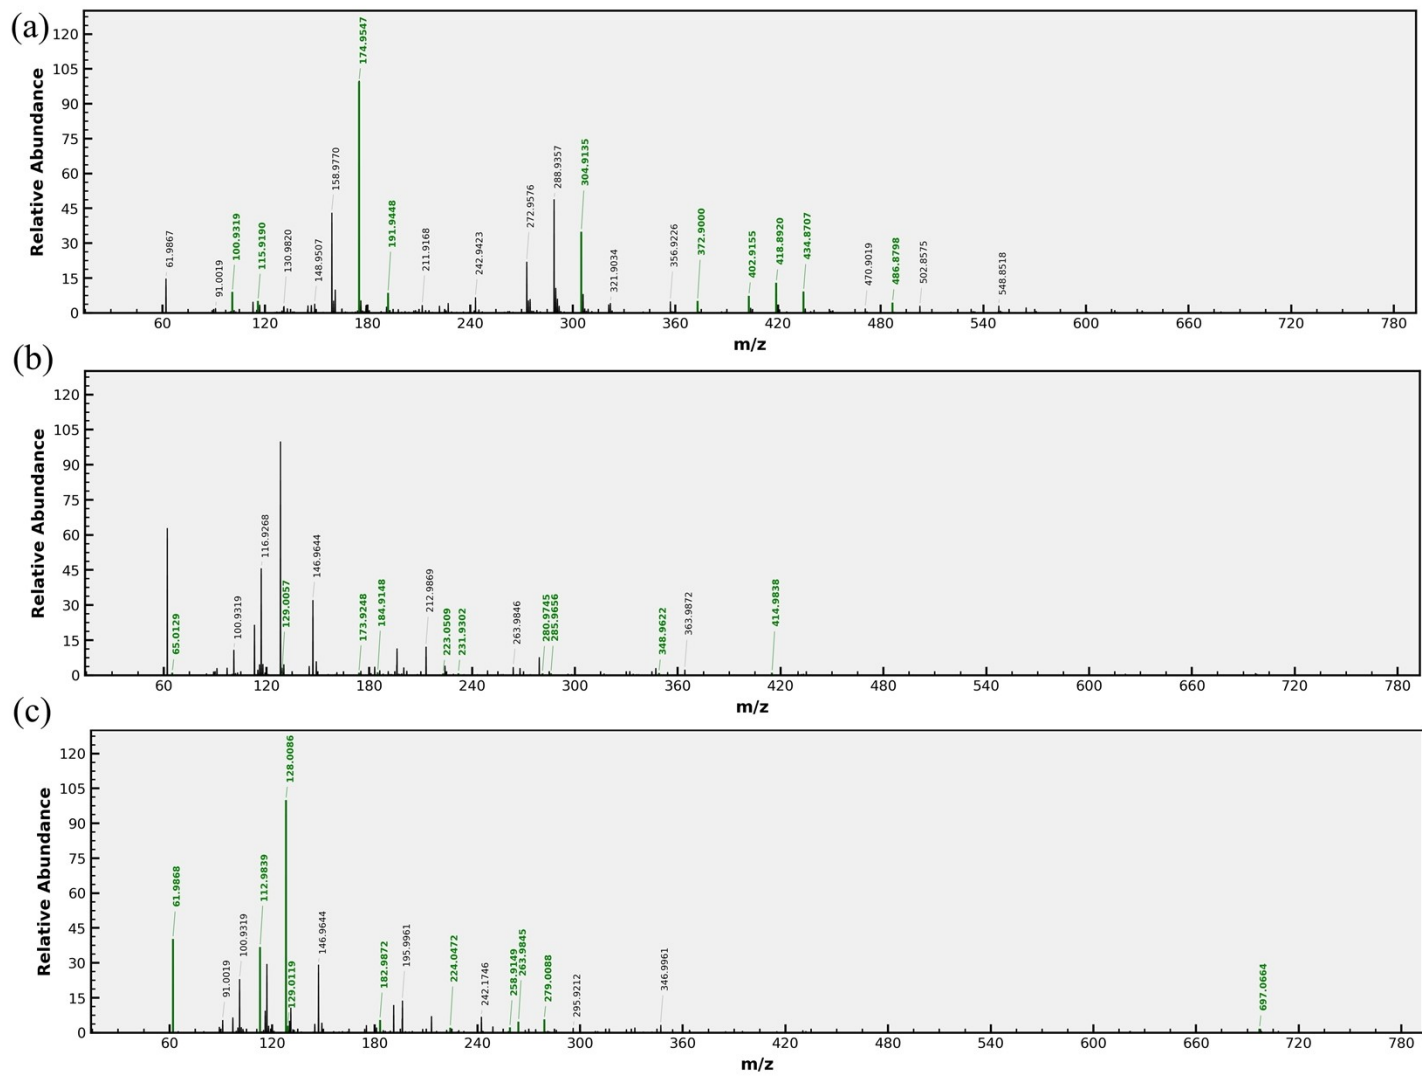

Fig. S6. Mass spectra of the photodegradation intermediates of TC at different times: (a) 30 min, (b) 60 min, (c) 90 min.
